# Supplementary material for: Bacterial spore detection and analysis using hyperpolarized 129Xe chemical exchange saturation transfer (Hyper-CEST) NMR
Source: Royal Society of Chemistry journal article supplement (doi:10.1039/c4sc01190b), 2014-01-01
Supplement: c4sc01190b1.pdf [file c4sc01190b1.pdf]

## SUPPORTING INFORMATION

Bacterial spore detection and analysis using hyperpolarized  $^{129}\text{Xe}$   
chemical exchange saturation transfer (Hyper-CEST) NMR

*Yubin Bai<sup>1</sup>, Yanfei Wang<sup>1</sup>, Mark Goulian<sup>2</sup>, Adam Driks<sup>3</sup>, and Ivan J. Dmochowski<sup>1\*</sup>*

<sup>1</sup>Department of Chemistry, University of Pennsylvania, Philadelphia, Pennsylvania 19104, USA.

<sup>2</sup>Department of Biology, University of Pennsylvania, Philadelphia, Pennsylvania 19104, USA.

<sup>3</sup>Department of Microbiology and Immunology, Loyola University Chicago, Maywood, Illinois 60153, USA.

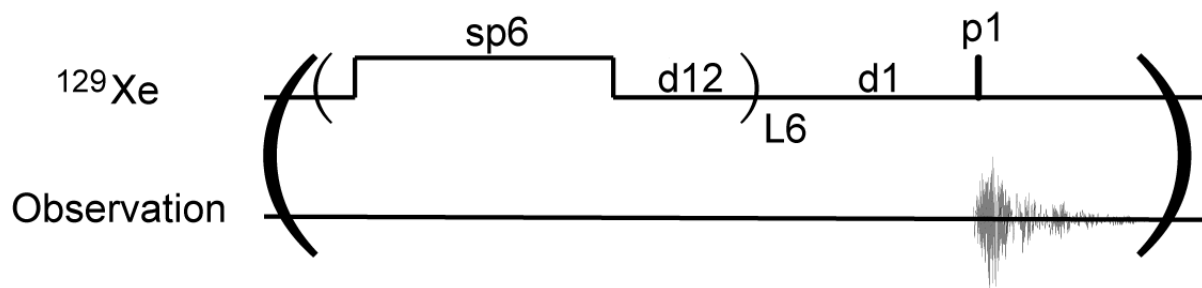

**Figure S1.**  $^{129}\text{Xe}$  Hyper-CEST pulse sequence. Components of the pulse sequence include: sp6, 180-degree saturation pulse (DSnob shaped) tuned at pre-selected frequencies, 0.8 - 2.6 ms; d12, delay between saturation pulses, 0.02 - 20 ms; d1, delay before 90-degree excitation pulse, 0.5 - 1.5 s; p1, 90-degree excitation pulse, 26 ms; L6, number of saturation cycles, 0 – 2000. For Hyper-CEST profile experiments, sp6 frequency is systematically changed; for depolarization rate experiments, L6 is increased in fixed step widths in each experiment.

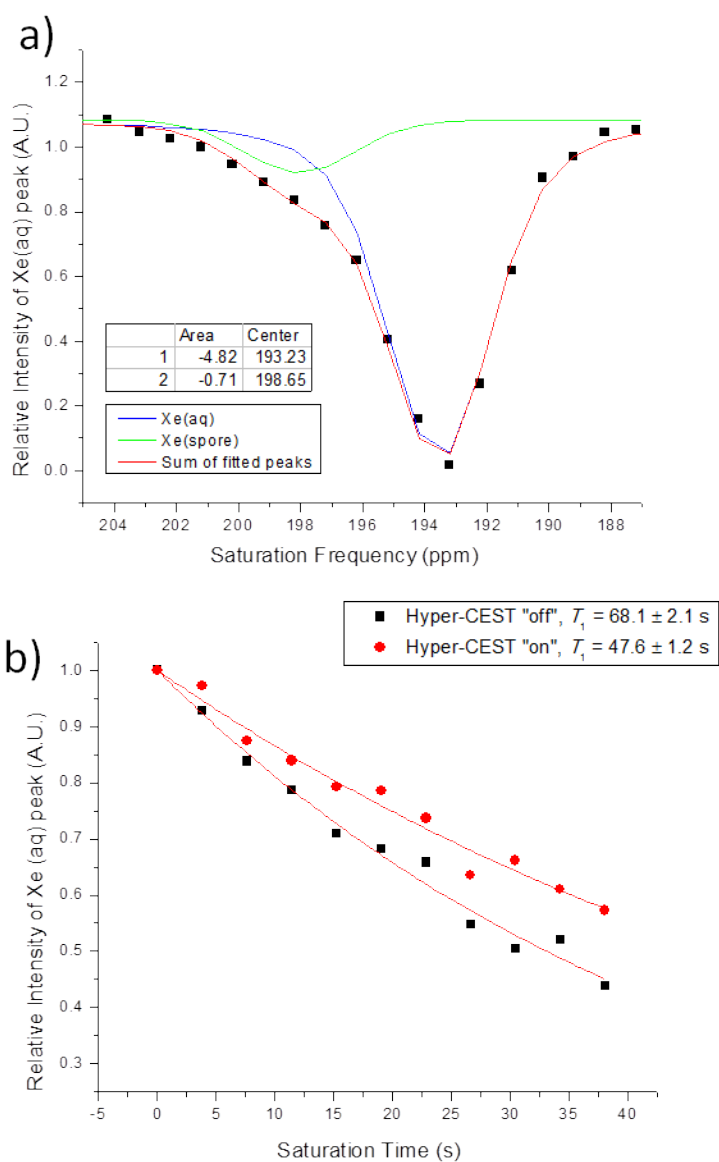

**Figure S2.** (a) Hyper-CEST profile of *B. anthracis* Sterne-JAB-13 spores at  $1.2 \times 10^7$  cfu/mL with 300 pulse cycles for saturation exchange; (b) Hyper-CEST depolarization curve of the same spore sample as in (a).

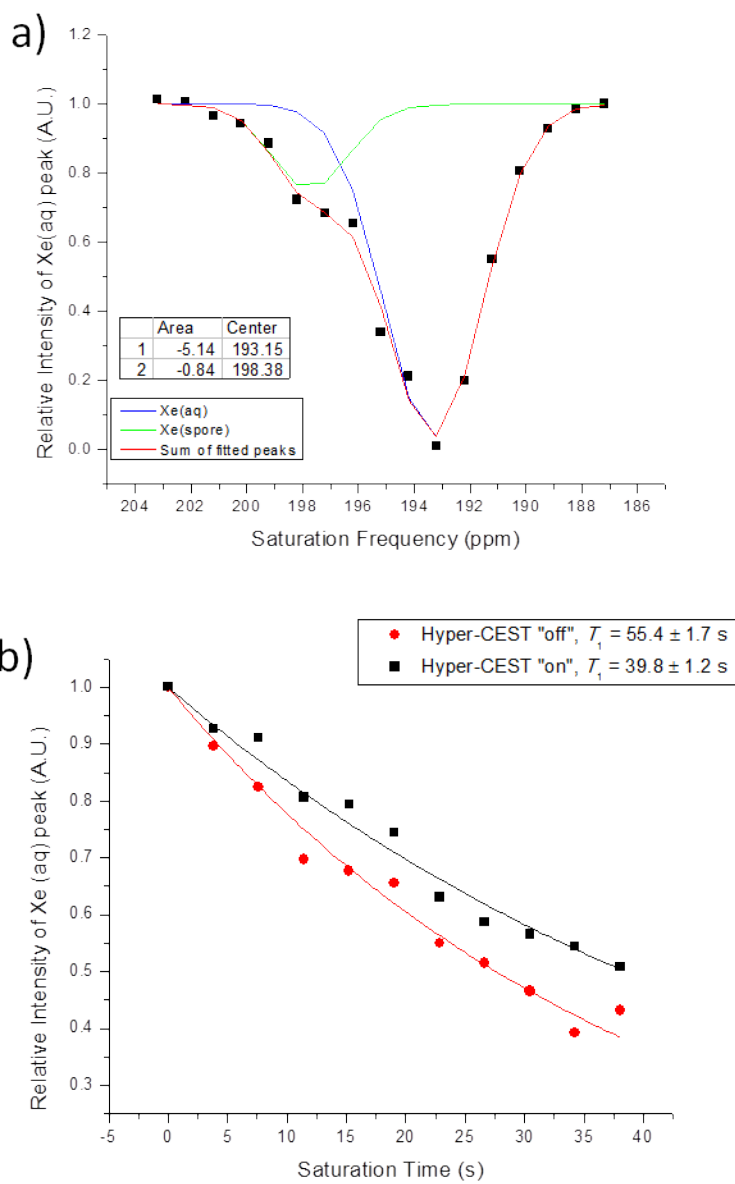

**Figure S3.** (a) Hyper-CEST profile of *B. anthracis* RG56 spores at  $1.2 \times 10^7$  cfu/mL with 300 pulse cycles for saturation exchange; (b) Hyper-CEST depolarization curve of *B. anthracis* RG56 spores at  $1.2 \times 10^7$  cfu/mL.

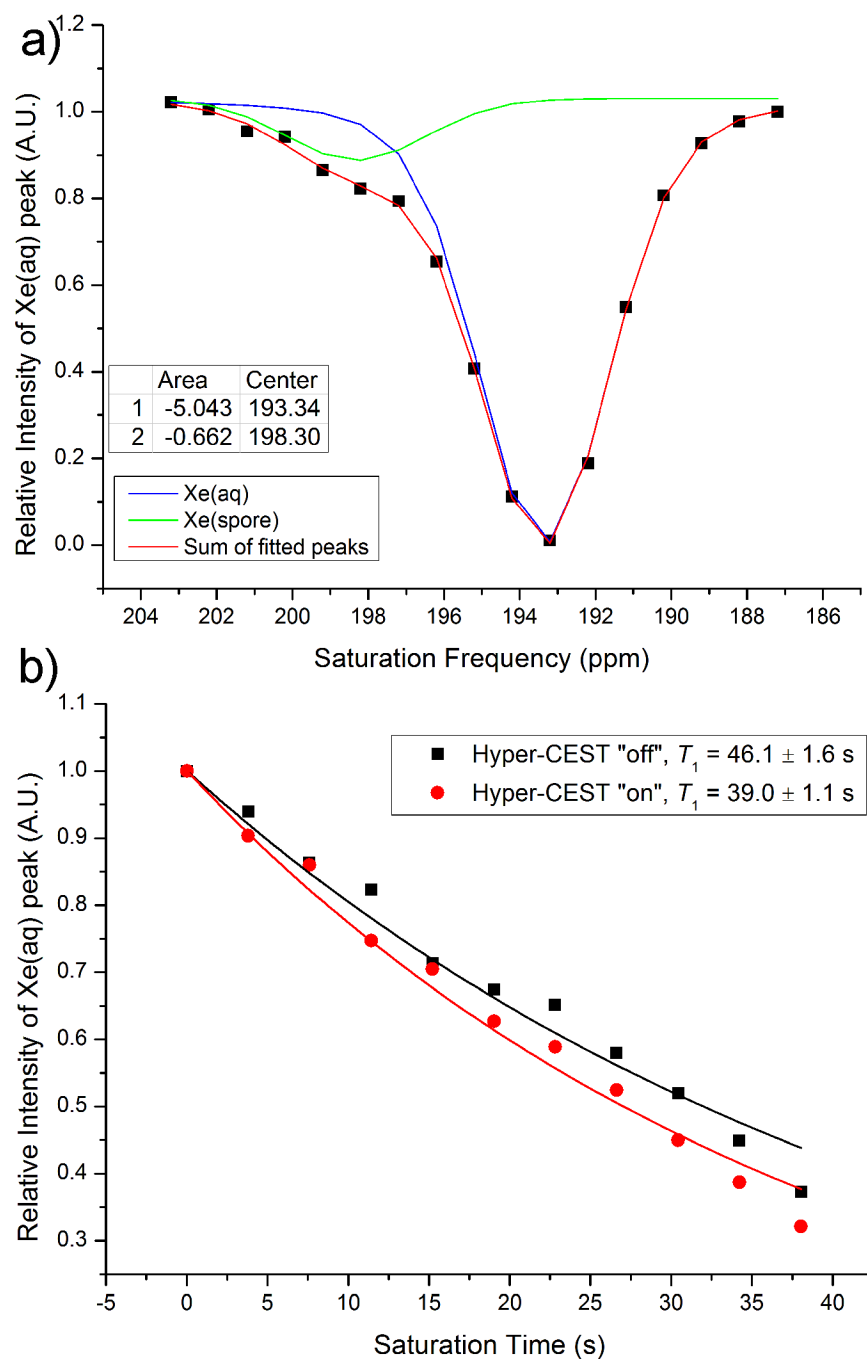

**Figure S4.** (a) Hyper-CEST profile of *B. subtilis* PY79 spores at  $1.2 \times 10^7$  cfu/mL with 200 pulse cycles for saturation exchange; (b) Hyper-CEST depolarization curve of *B. subtilis* PY79 spores at  $1.2 \times 10^7$  cfu/mL.

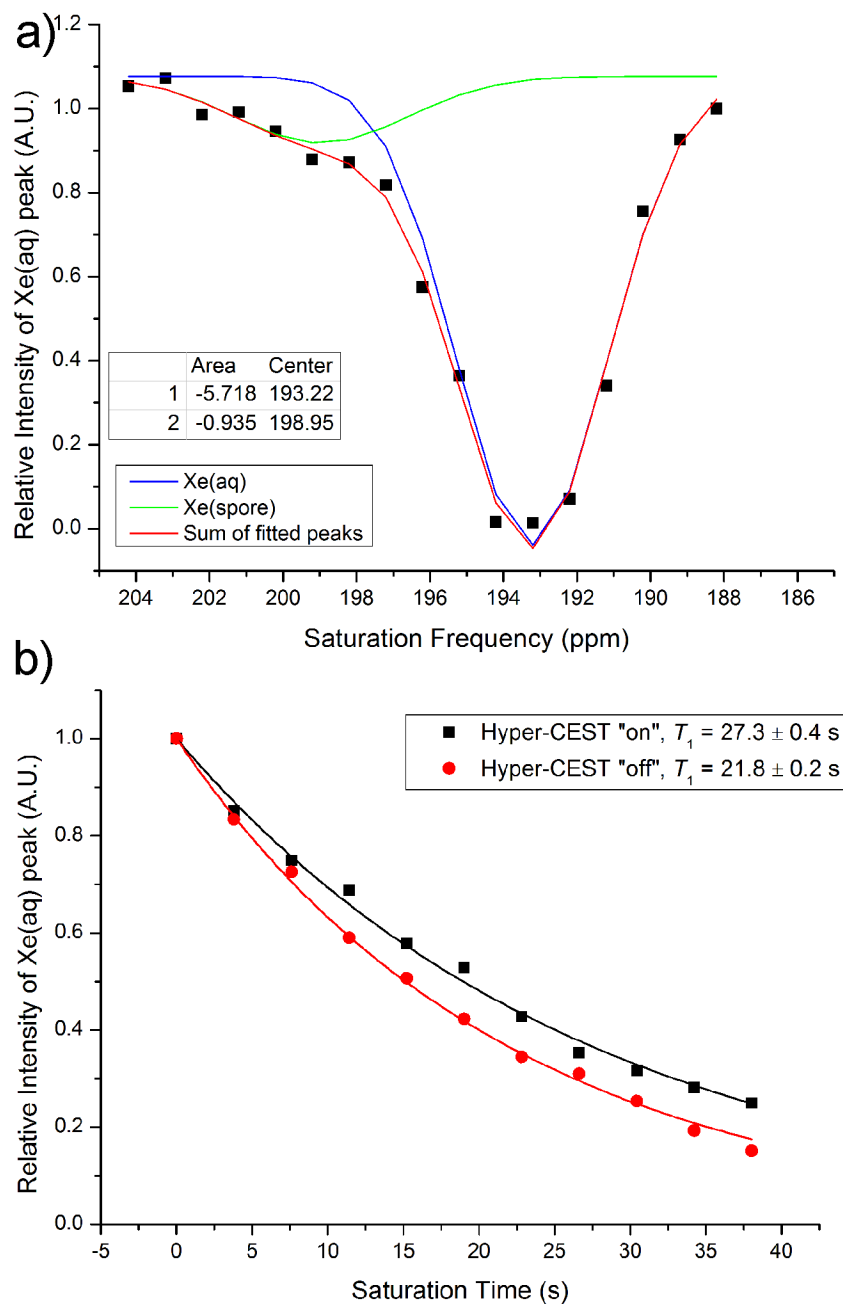

**Figure S5.** (a) Hyper-CEST profile of *B. subtilis* AD28 spores at  $1.2 \times 10^7$  cfu/mL with 200 pulse cycles for saturation exchange; (b) Hyper-CEST depolarization curve of *B. subtilis* AD28 spores at  $1.2 \times 10^7$  cfu/mL.

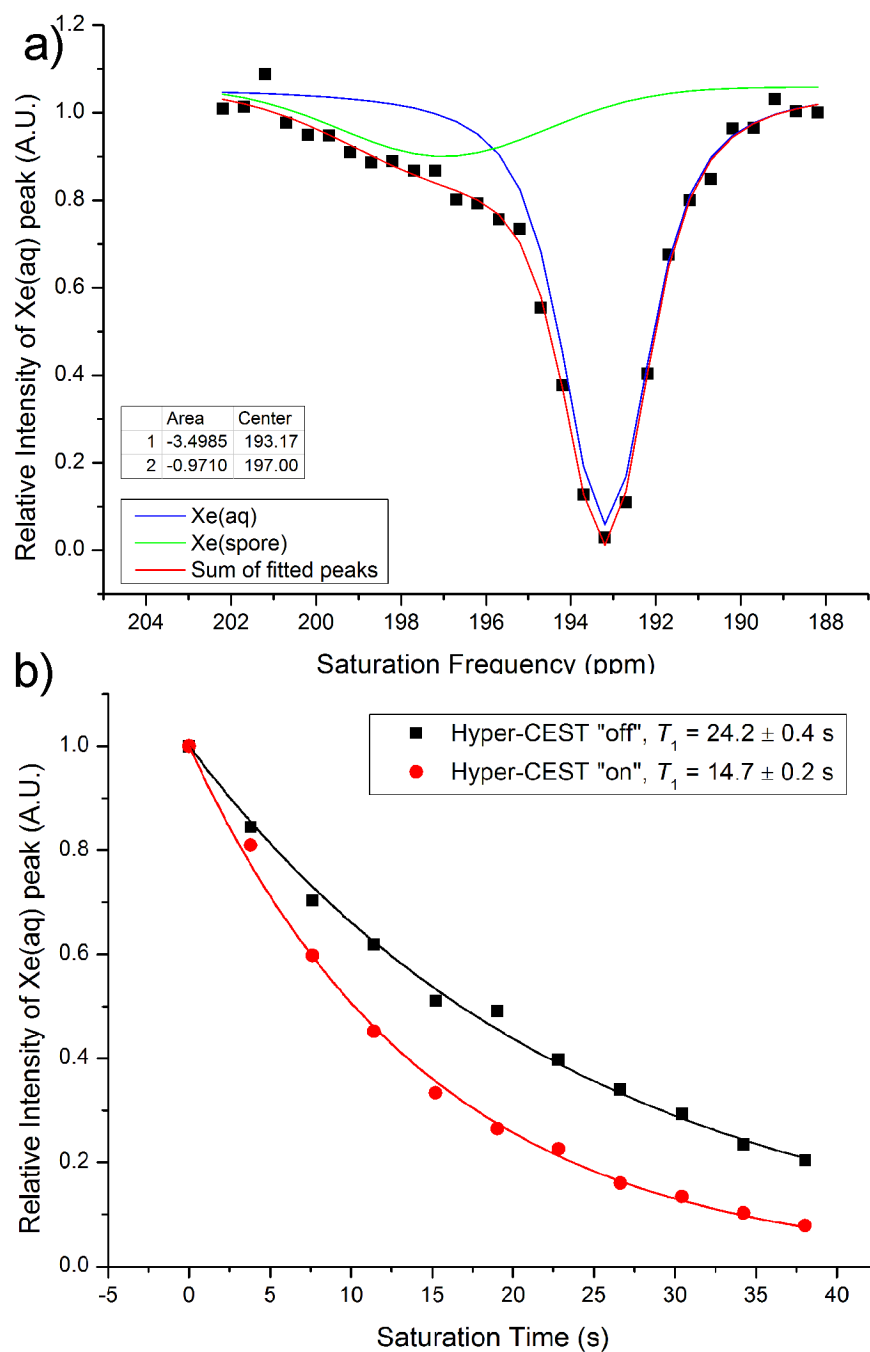

**Figure S6.** (a) Hyper-CEST profile of *B. subtilis* AD142 spores at  $1.2 \times 10^7$  cfu/mL with 200 pulse cycles for saturation exchange; (b) Hyper-CEST depolarization curve of *B. subtilis* AD142 spores at  $1.2 \times 10^7$  cfu/mL.

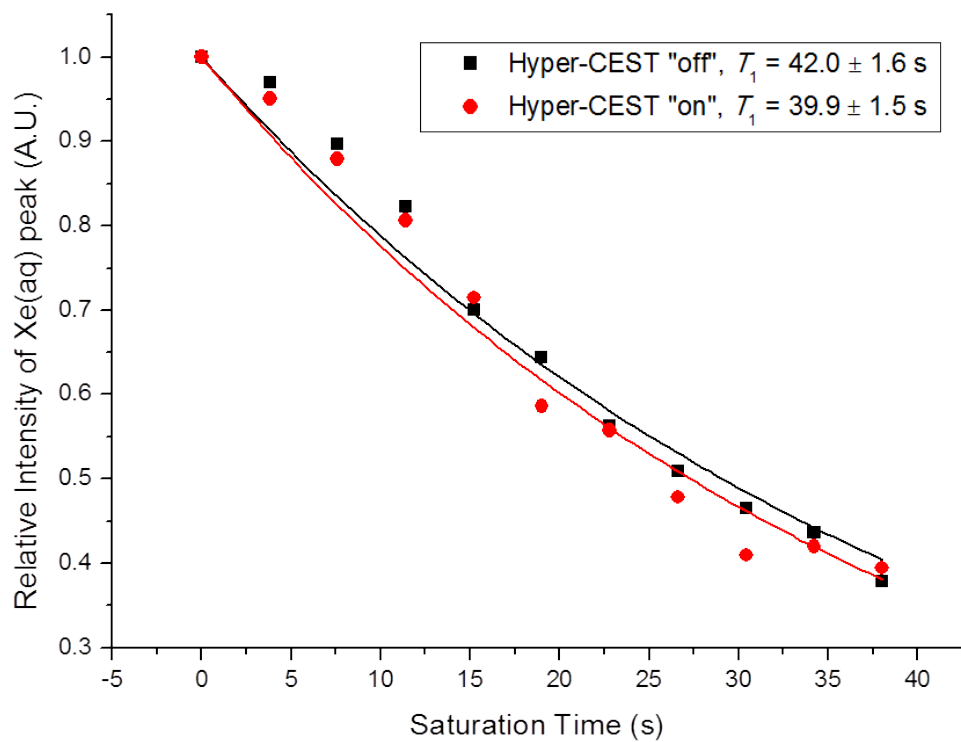

**Figure S7.** Hyper-CEST depolarization curve of *wild type B. anthracis* (Sterne 34F2) spores at  $1.2 \times 10^7$  cfu/mL.



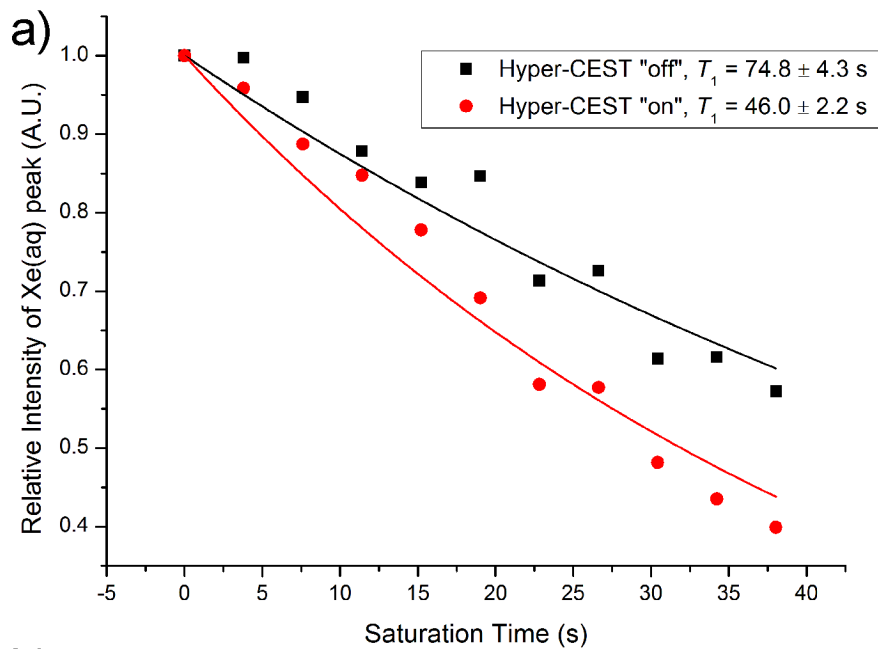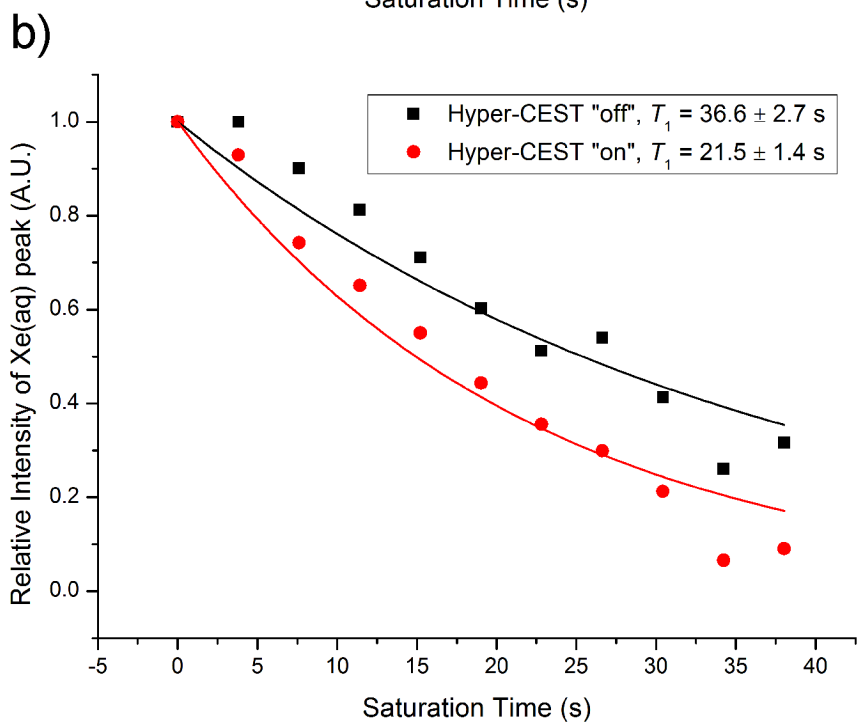

**Figure S8.** (a) Hyper-CEST depolarization curve of *B. subtilis* AD142 spores at  $1.2 \times 10^5$  cfu/mL;  
 (b) Hyper-CEST depolarization curve of *B. subtilis* AD142 spores at  $1.2 \times 10^6$  cfu/mL.
